# Supplementary material
Source: PubMed Central journal article supplement (PMC4763977)

Supplementary Figure 1

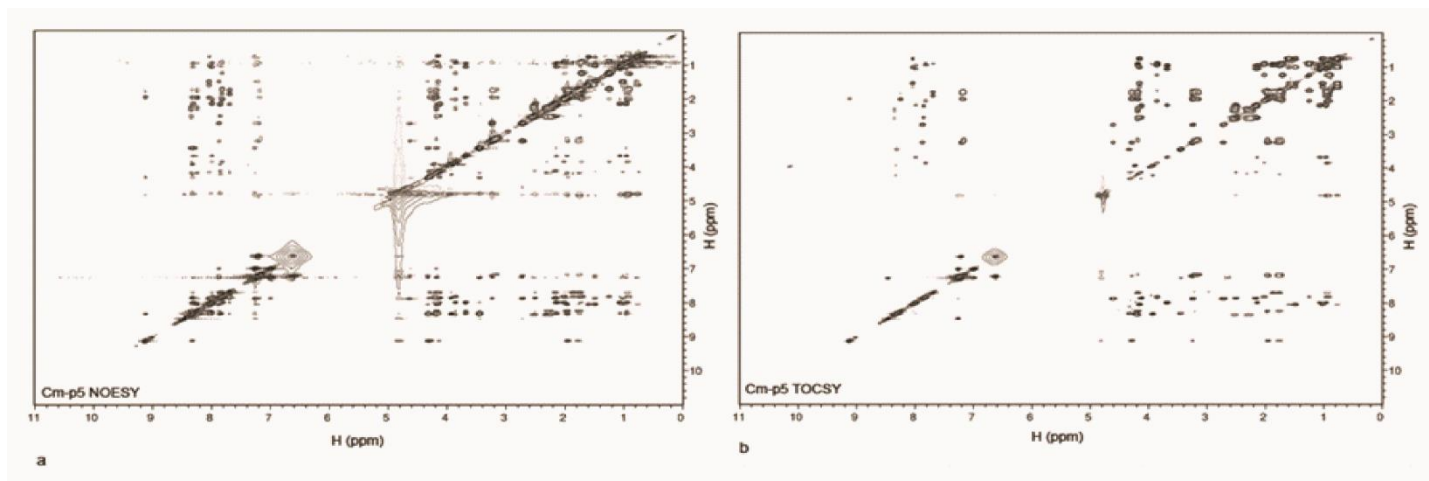

Supplement: supp_fj.14-269860_Supplemental_Figure1.pdf [file supp_fj.14-269860_Supplemental_Figure1.pdf]
